# Supplementary material for: Selective cyclohexene oxidation with O2, H2O2 and tert-butyl hydroperoxide over spray-flame synthesized LaCo1−xFexO3 nanoparticles
Source: Royal Society of Chemistry journal article supplement (doi:10.1039/d0cy00906g), 2020-01-01
Supplement: d0cy00906g1.pdf [file d0cy00906g1.pdf]

## Supporting Information

### **Selective Cyclohexene Oxidation with O<sub>2</sub>, H<sub>2</sub>O<sub>2</sub> and *tert*-Butyl Hydroperoxide over Spray-Flame Synthesized LaCo<sub>1-x</sub>Fe<sub>x</sub>O<sub>3</sub> Nanoparticles**

Julia Bükér,<sup>[a]</sup> Baris Alkan,<sup>[b]</sup> Qi Fu,<sup>[a]</sup> Wei Xia,<sup>[a]</sup> Jonas Schulwitz,<sup>[a]</sup> Daniel Waffel,<sup>[a]</sup> Tobias Falk,<sup>[a]</sup> Christof Schulz,<sup>[b]</sup> Hartmut Wiggers,<sup>[b]</sup> Martin Muhler,<sup>[a],[c]</sup> and Baoxiang Peng\*<sup>[a],[c]</sup>

<sup>a</sup> Laboratory of Industrial Chemistry, Ruhr-University Bochum, 44780 Bochum, Germany

<sup>b</sup> IVG, Institute for Combustion and Gas Dynamics – Reactive Fluids and CENIDE, Center for Nanointegration Duisburg-Essen, University of Duisburg-Essen, 47057 Duisburg, Germany

<sup>c</sup> Max Planck Institute for Chemical Energy Conversion, 45470 Mülheim an der Ruhr, Germany

\*Corresponding author. Email: [baoxiang.peng@techem.rub.de](mailto:baoxiang.peng@techem.rub.de)

**Table S1.** Bulk chemical composition of  $\text{LaCo}_{1-x}\text{Fe}_x\text{O}_3$  catalysts calculated by EDX measurements at STEM mode.

| Catalysts                                    | La/(Co+Fe)      | Fe/(Fe+Co)      |
|----------------------------------------------|-----------------|-----------------|
| $\text{LaCoO}_3$                             | $1.10 \pm 0.03$ | -               |
| $\text{LaCo}_{0.8}\text{Fe}_{0.2}\text{O}_3$ | $1.19 \pm 0.16$ | $0.20 \pm 0.03$ |
| $\text{LaCo}_{0.7}\text{Fe}_{0.3}\text{O}_3$ | $1.10 \pm 0.12$ | $0.29 \pm 0.01$ |
| $\text{LaCo}_{0.6}\text{Fe}_{0.4}\text{O}_3$ | $1.14 \pm 0.04$ | $0.36 \pm 0.01$ |

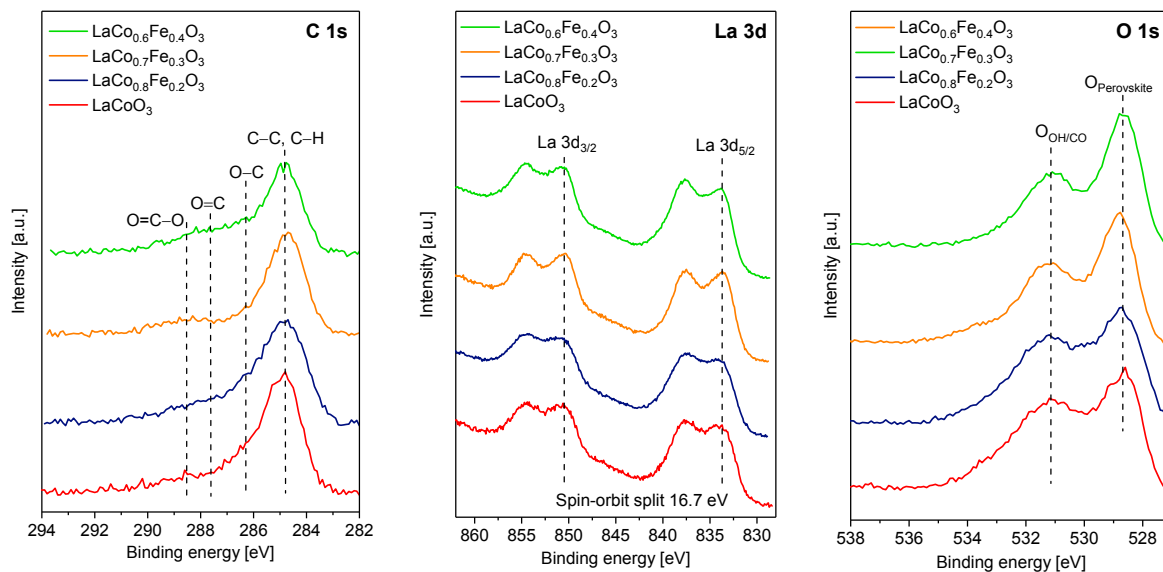

**Figure S1.** XPS spectra of the C 1s, La 3d and O 1s regions of the  $\text{LaCo}_{1-x}\text{Fe}_x\text{O}_3$  samples.

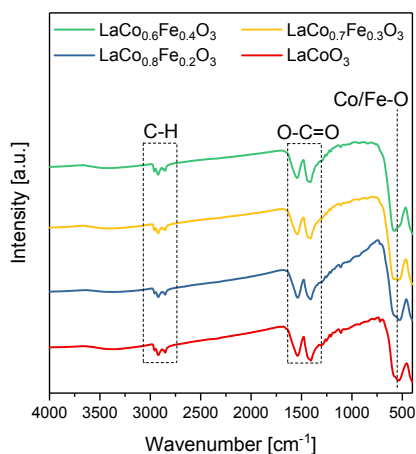

**Figure S2.** FT-IR spectra of the  $\text{LaCo}_{1-x}\text{Fe}_x\text{O}_3$  samples.

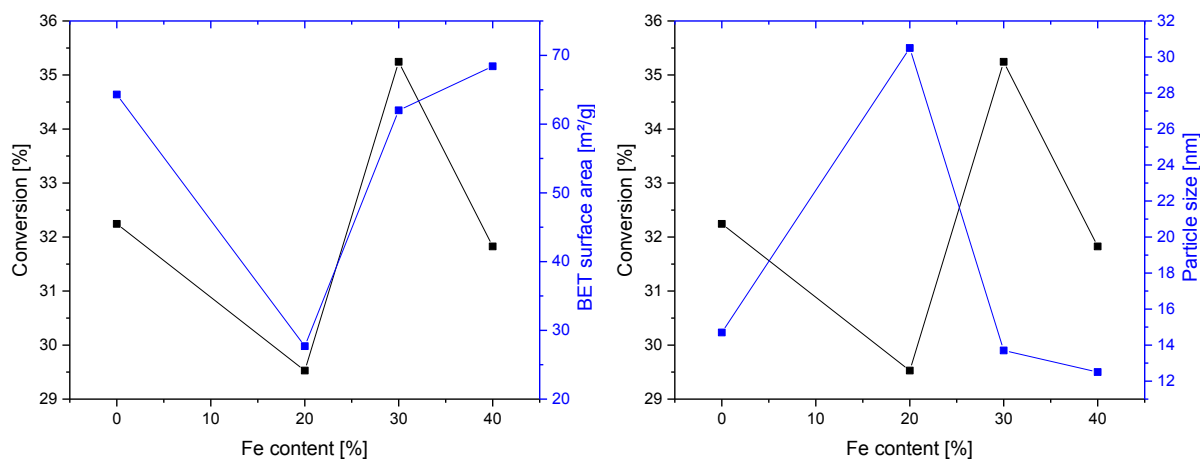

**Figure S3.** Correlations of cyclohexene conversion with BET surface areas (left) and particle sizes (right) after 2 h reaction over different  $\text{LaCo}_{1-x}\text{Fe}_x\text{O}_3$  catalysts.

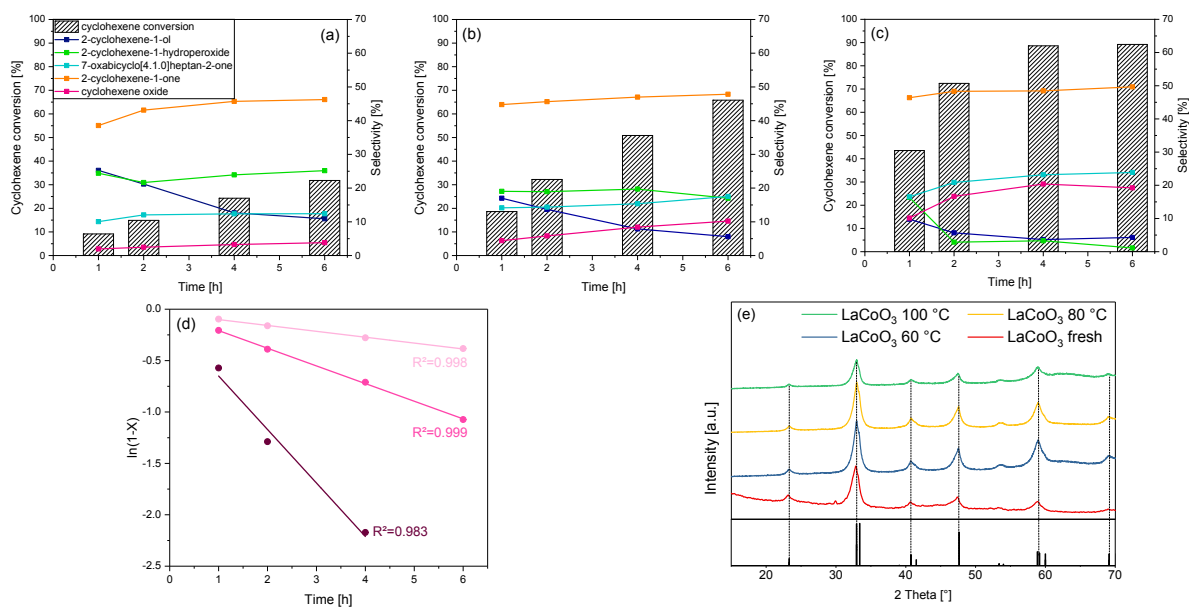

**Figure S4.** Effect of temperature on cyclohexene oxidation over  $\text{LaCoO}_3$  at 60 (a), 80 (b) and 100 °C (c), linearized plot of the conversion as a function of time (d) and XRD patterns of used catalysts (e) (red: cyclohexene conversion, dark blue: 2-cyclohexene-1-ol, orange: 2-cyclohexene-1-one, green: 2-cyclohexene-1-hydroperoxide, pink: cyclohexene oxide, light blue: 7-oxabicyclo[4.1.0]heptan-2-one).

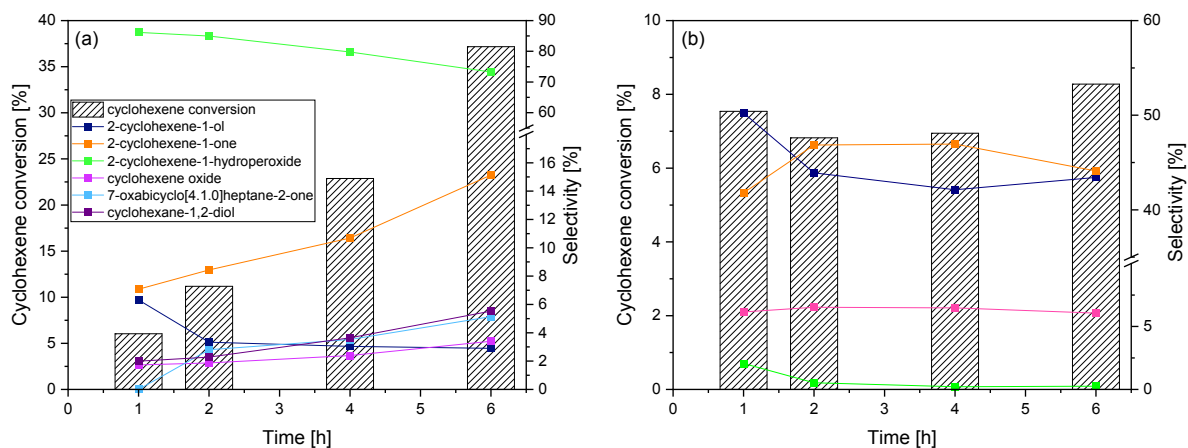

**Figure S5.** Cyclohexene oxidation under standard conditions in the absence of a catalyst (a) and in the presence of  $\text{LaCoO}_3$  in  $\text{N}_2$  atmosphere.

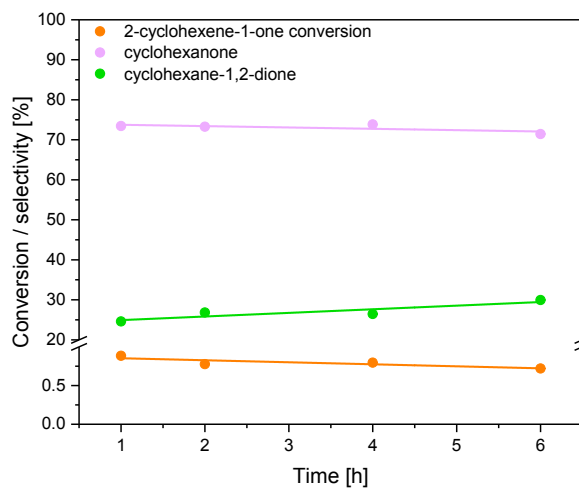

**Figure S6.** Oxidation of 2-cyclohexene-1-one with  $\text{O}_2$  over  $\text{LaCoO}_3$  under standard conditions.

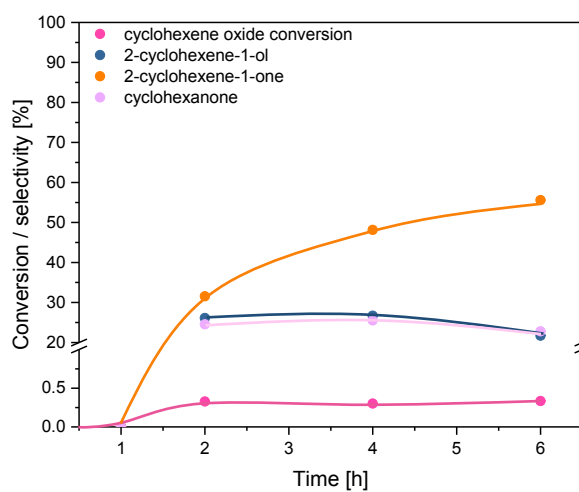

**Figure S7.** Oxidation of cyclohexene oxide with  $\text{O}_2$  over  $\text{LaCoO}_3$  under standard conditions.

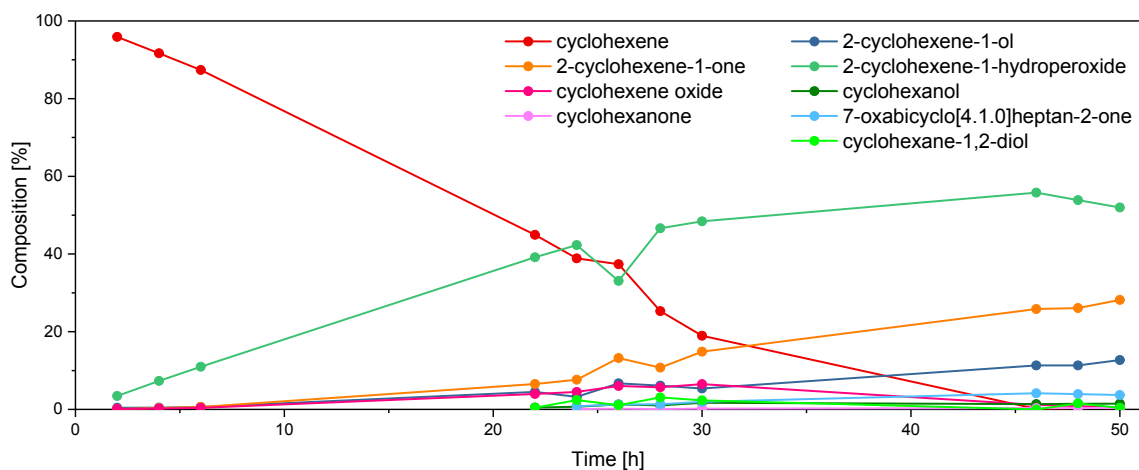

Figure S8. Synthesis of 2-cyclohexene-1-hydroperoxide.

Table S2. Decomposition of 2-cyclohexene-1-hydroperoxide over  $\text{LaCoO}_3$ .

| Time [h] | Composition [%]                                                                    |                                                                                    |                                                                                    |                                                                                    |                                                                                     |                                                                                      | others <sup>[a]</sup> |
|----------|------------------------------------------------------------------------------------|------------------------------------------------------------------------------------|------------------------------------------------------------------------------------|------------------------------------------------------------------------------------|-------------------------------------------------------------------------------------|--------------------------------------------------------------------------------------|-----------------------|
|          |  |  |  |  |  |  |                       |
| 0        | 0.0                                                                                | 16.1                                                                               | 30.0                                                                               | 45.9                                                                               | 0.9                                                                                 | 4.1                                                                                  | 3.1                   |
| 1        | 0.0                                                                                | 16.0                                                                               | 32.6                                                                               | 41.9                                                                               | 0.8                                                                                 | 4.4                                                                                  | 4.2                   |
| 2        | 0.0                                                                                | 16.8                                                                               | 35.0                                                                               | 38.3                                                                               | 0.8                                                                                 | 4.8                                                                                  | 4.4                   |
| 4        | 0.0                                                                                | 18.1                                                                               | 39.5                                                                               | 31.4                                                                               | 0.8                                                                                 | 5.5                                                                                  | 4.7                   |
| 6        | 0.0                                                                                | 18.9                                                                               | 43.4                                                                               | 26.0                                                                               | 0.8                                                                                 | 6.0                                                                                  | 5.0                   |
| $\Delta$ | 0.0                                                                                | + 2.8                                                                              | + 13.4                                                                             | - 19.9                                                                             | - 0.1                                                                               | + 1.9                                                                                | + 1.9                 |

<sup>[a]</sup> Others are cyclohexanone, cyclohexanol and cyclohexane-1,2-diol
